# Supplementary material for: GATA6 Expression Distinguishes Classical and Basal-like Subtypes in Advanced Pancreatic Cancer
Source: Oxford University Press journal article supplement (doi:10.1158/1078-0432.ccr-19-3724), 2020-03-10
Supplement: 10780432ccr193724-sup-232370_2_supp_6133271_q6mj25.doc [file 10780432ccr193724-sup-232370_2_supp_6133271_q6mj25.doc]

**Emethods: Immunohistochemical staining and antibodies**

**Immunohistochemical Staining Protocol GATA 6**

(4um formalin-fixed paraffin-embedded sections on charged slides)

1) Dewax slides through 5 changes of xylene

2) Hydrate slides through decreasing grades of alcohols to water

3) Blocked with 3% hydrogen peroxide for 15min.

4) Antigen retrieval or unmasking procedures are applied (see chart below).

5) Avidin/Biotin blocking (Vector Cat#VECTSP2001) following kit instructions.

6) Apply 10% normal rabbit (Vector cat#VECTS5000) serum for 20min

7) Apply primary antibody (see below for dilution and incubation time)

8) Apply Biotin labeled secondary Rabbit anti-goat (Vector Cat# VECTBA5000) for 30 min

9) Horseradish peroxidase-conjugated ultra-streptavidin labeling reagent (Empire Genomics Cat# BP2378) for 30 min

10) Develop color using DAB (DAKO Cat# K3468)

11) Counterstain lightly with Mayer’s Hematoxylin

12) Dehydrated in alcohols, and clear in xylene

13) Mount sections with MM 24 Leica mounting medium (Cat#3801120).

| **Antibody** | **Source** | **Cat. Number** | **Clone** | **Pre-treatment** | **Antigen retrieval temperature** | **Dilution, incubation,**  **temperature** | **Serum block** | **Detection Kit** |
| --- | --- | --- | --- | --- | --- | --- | --- | --- |
| **GATA6** | R&D | AF1700 | n/a | Citrate pH6.0 | 98°C | 1/1000 overnight RT | 2.5%Normal Rabbit serum | Non-polymer kit, ABC method with Bition label Rabbit anit-goat secondary, and Horseradish peroxidase followed by DAB. |

**Immunohistochemical Protocol Keratins (CK5, CK14, CK17)**

(4m formalin-fixed paraffin-embedded sections on charged slides)

1. Dewax slides through 5 changes of xylene
2. Hydrate slides through decreasing grades of alcohols to water
3. Blocked with 3% hydrogen peroxide
4. Antigen retrieval or unmasking procedures are applied (see chart attached).
5. Apply Serum block as per MACH 4 Universal HRP kit
6. Apply primary antibody (see below for dilution and incubation time)
7. Apply MACH 4 reagents (Intermedico Cat# BC-M4U534L) as per kit instructions
8. Develop color using DAB (DAKO Cat# K3468)
9. Counterstain lightly with Mayer’s Hematoxylin,
10. Dehydrated in alcohols, and clear in xylene
11. Mount sections with MM 24 Leica mounting medium (Cat#3801120).

Results: reaction products: brown (DAB); non-reactive nuclei: blue.

| **Antibody** | **Source** | **Cat. Number** | **Clone** | **Pre-treatment** | **Antigen retrieval temperature** | **Dilution, incubation,**  **temperature** | **Serum block** | **Detection Kit** |
| --- | --- | --- | --- | --- | --- | --- | --- | --- |
| **CK5** | Leica | NCL-LCK5 | XM26 | Tris-EDTA pH 9.0 | 120°C | 1/400 1hr RT | 2.5%Normal horse serum | MACH 4 (Intermedico Cat. Number BC-MU534G) |
| **CK14** | Leica | NCL-CK14 | LL002 | Citrate pH6.0 | 120°C | 1/100 1hr RT | 2.5%Normal horse serum | MACH 4 (Intermedico Cat. Number BC-MU534G) |
| **CK17** | Abcam | Ab109725 | EP1623 | Tris-EDTA pH 9.0 | 120°C | 1/200 1hr RT | 2.5%Normal horse serum | MACH 4 (Intermedico Cat. Number BC-MU534G) |

- Serum block for Mach 4: 2.5% Normal Horse Serum 5 min RT.
- All dewaxing was done at RT
- 3.0% H2O2 at RT 15 min
- Hematoxylin counter stain is ¼ dilution at RT for 15 seconds

**Buffers:**

Citrate pH6.0: (10X Stock) Sodium Citrate 0.1M Citric Acid and 0.1M Sodium Citrate

Tris-EDTA pH9.0: (10X stock) 14.4g Tris (Hydroxymethyl) Aminomethane and 1.44 Ethylenediaminetetraacetic acid Disodium salt dehydrate

**Immunohistochemical Protocol for Dual Chromogenic Staining: Sequential staining**

(4m formalin-fixed paraffin-embedded sections on charged slides)

1. Dewax slides through 5 changes of xylene
2. Hydrate slides through decreasing grades of alcohols to water
3. Blocked with 3% hydrogen peroxide
4. Antigen retrieval or unmasking procedures are applied (see chart below).
5. Avidin/Biotin blocking (Vector Cat#VECTSP2001) following kit instructions
6. Apply 10% normal serum for 20min
7. Apply 1st primary antibody (see below for dilution and incubation time)
8. Apply Biotin labeled secondary for 30 min
9. Horseradish peroxidase-conjugated ultra-streptavidin labeling reagent for 30 min

(Empire Genomics Cat# BP2378)

1. Develop color using DAB (DAKO Cat# K3468)
2. Rinse with water 3 times
3. Apply Serum block as per IMMPRESS –AP kit
4. Apply 2nd primary antibody (see below for dilution and incubation time)
5. Apply IMMPRESS –AP anti-rabbit kit (Vector Cat# MP5401-15), as per kit instructions
6. Develop color using Warp Red (Intermedico BC-WR806H)
7. Counterstain lightly with Mayer’s Hematoxylin,
8. Dehydrate quickly in 2-3 changes of Alcohol, and clear in xylene
9. Mount sections with MM 24 Leica mounting medium (Cat#3801120).

Results: Reaction products ------- Brown (DAB)/Red (Warp Red)

Non-reactive nuclei ------Blue

| **Antibody** | **Manufacturer** | **Cat. #** | **Clone** | **Pretreatment** | **Dilution (Incubation)** |
| --- | --- | --- | --- | --- | --- |
| 1. GATA 6 | R&D systems | AF 1700 | N/A | Low temp Citrate pH6.0 | 1/1000 Overnight |
| 1. Ck5 | Leica | NCL-LCK5 | XM26 | Same as above | 1/50 2hrs |

(H.I.E.R) Heat Induced Epitope Retrieval refers to heating (microwave, steamer, oven etc.) tissue sections in a buffer solution.

Enzyme Retrieval: Refers to the use of an enzyme to unmask the antigenic site.

**Buffers & Enzymes used in the PRP Lab**

Citrate pH6.0: (10X Stock) Sodium Citrate 0.1M Citric Acid and 0.1M Sodium Citrate
